# Supplementary material
Source: PubMed Central journal article supplement (PMC10650952)
Supplement: MD-014-D3MD00456B-s001.pdf [file MD-014-D3MD00456B-s001.pdf]

Supporting information for:

## Semisynthetic polymyxins with potent antibacterial activity and reduced kidney cell toxicity

Cornelis J. Slingerland,<sup>1</sup> Vladyslav Lysenko,<sup>1</sup> Samhita Chaudhuri,<sup>1</sup> Charlotte M.J. Wesseling,<sup>1</sup> Devon Barnes,<sup>2</sup> Rosalinde Masereeuw,<sup>2</sup> Nathaniel I. Martin<sup>1,\*</sup>

<sup>1</sup>Biological Chemistry Group, Institute of Biology Leiden, Leiden University, Sylviusweg 72, 2333 BE Leiden, The Netherlands.

<sup>2</sup>Division of Pharmacology, Utrecht Institute of Pharmaceutical Sciences, Utrecht University, 3584 CG, Utrecht, The Netherlands.

\*All correspondence should be directed to [n.i.martin@biology.leidenuniv.nl](mailto:n.i.martin@biology.leidenuniv.nl)

### Table of contents

|        |                                                                                    |
|--------|------------------------------------------------------------------------------------|
| S2     | General Procedures                                                                 |
| S3-S10 | HPLC traces and HRMS data for final compounds                                      |
| S11    | Extended toxicity data on all analogues                                            |
| S12    | Extended toxicity data on <b>8d</b>                                                |
| S13    | Extended MIC data                                                                  |
| S14    | Synergy data on polymyxin B and <b>8d</b> with Gram-positive selective antibiotics |
| S15    | Bacterial strain source indications                                                |
| S15    | References                                                                         |

## General Procedures

All reagents employed were of American Chemical Society (ACS) grade or finer and were used without further purification unless otherwise stated. Commercially sourced Polymyxin B was obtained as a mixture of isomers (Combi-Blocks, San Diego, USA), with polymyxin B<sub>1</sub>, B<sub>2</sub>, and B<sub>3</sub> accounting for >90% of the isomers.

For compound characterization, HRMS analysis was performed on a Shimadzu Nexera X2 UHPLC system with a Waters Acquity HSS C18 column (2.1 × 100 mm, 1.8 μm) at 30 °C and equipped with a diode array detector. The following solvent system, at a flow rate of 0.5 mL/min, was used: solvent A, 0.1 % formic acid in water; solvent B, 0.1 % formic acid in acetonitrile. Gradient elution was as follows: 95:5 (A/B) for 1 min, 95:5 to 15:85 (A/B) over 6 min, 15:85 to 0:100 (A/B) over 1 min, 0:100 (A/B) for 3 min, then reversion back to 95:5 (A/B) for 3 min. This system was connected to a Shimadzu 9030 QTOF mass spectrometer (ESI ionization) calibrated internally with Agilent's API-TOF reference mass solution kit (5.0 mM purine, 100.0 mM ammonium trifluoroacetate and 2.5 mM hexakis(1*H*,1*H*,3*H*-tetrafluoropropoxy)phosphazine) diluted to achieve a mass count of 10000.

Purity of the peptides was confirmed to be ≥ 95% by analytical RP-HPLC using a Shimadzu Prominence-i LC-2030 system with a Dr. Maisch ReproSil Gold 120 C18 column (4.6 × 250 mm, 5 μm) at 30 °C and equipped with a UV detector monitoring at 214 nm. The following solvent system, at a flow rate of 1 mL/min, was used: solvent A, 0.1 % TFA in water/acetonitrile, 95/5; solvent B, 0.1 % TFA in water/acetonitrile, 5/95. Gradient elution was as follows: 100:0 (A/B) for 3 min, 100:0 to 0:100 (A/B) over 47 min, 0:100 (A/B) for 4 min, then reversion back to 100:0 (A/B) over 1 min, 100:0 (A/B) for 5 min.

## HPLC traces and HRMS data for final compounds

### Compound 7a

| Composition                                                                    | Exact mass | M + H     | (M+2H)/2 | Found value |
|--------------------------------------------------------------------------------|------------|-----------|----------|-------------|
| C <sub>53</sub> H <sub>90</sub> N <sub>14</sub> O <sub>13</sub> S <sub>2</sub> | 1194.6253  | 1195.6333 | 598.3207 | 1195.6334   |

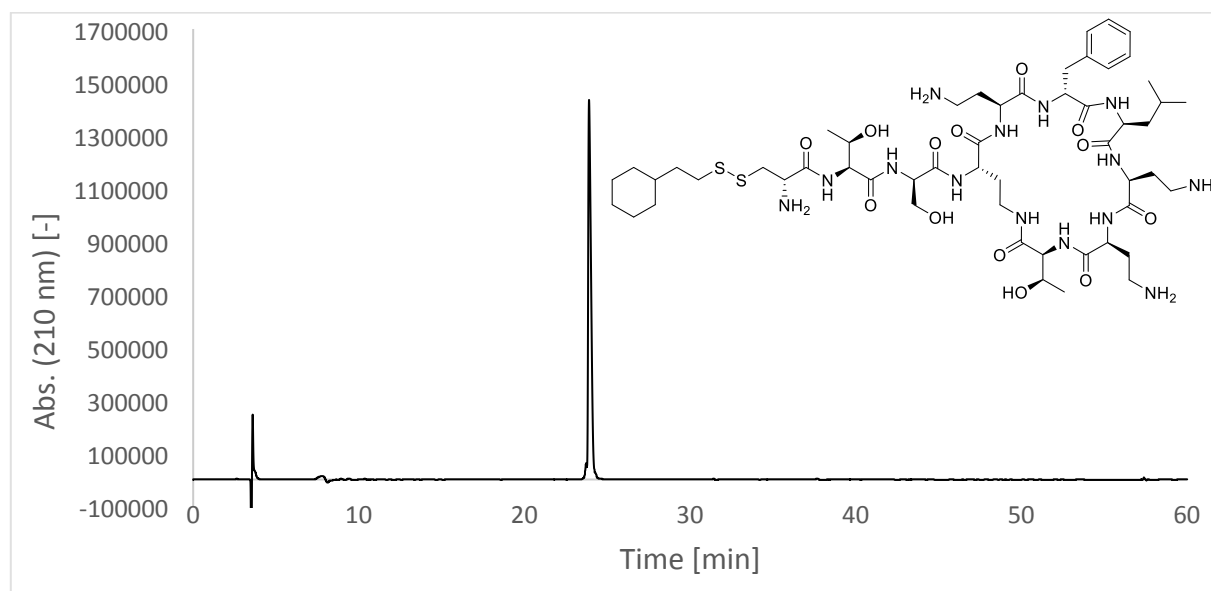

### Compound 7b

| Composition                                                                    | Exact mass | M + H     | (M+2H)/2 | Found value |
|--------------------------------------------------------------------------------|------------|-----------|----------|-------------|
| C <sub>52</sub> H <sub>88</sub> N <sub>14</sub> O <sub>12</sub> S <sub>2</sub> | 1194.6148  | 1165.6228 | 583.3154 | 1165.6224   |

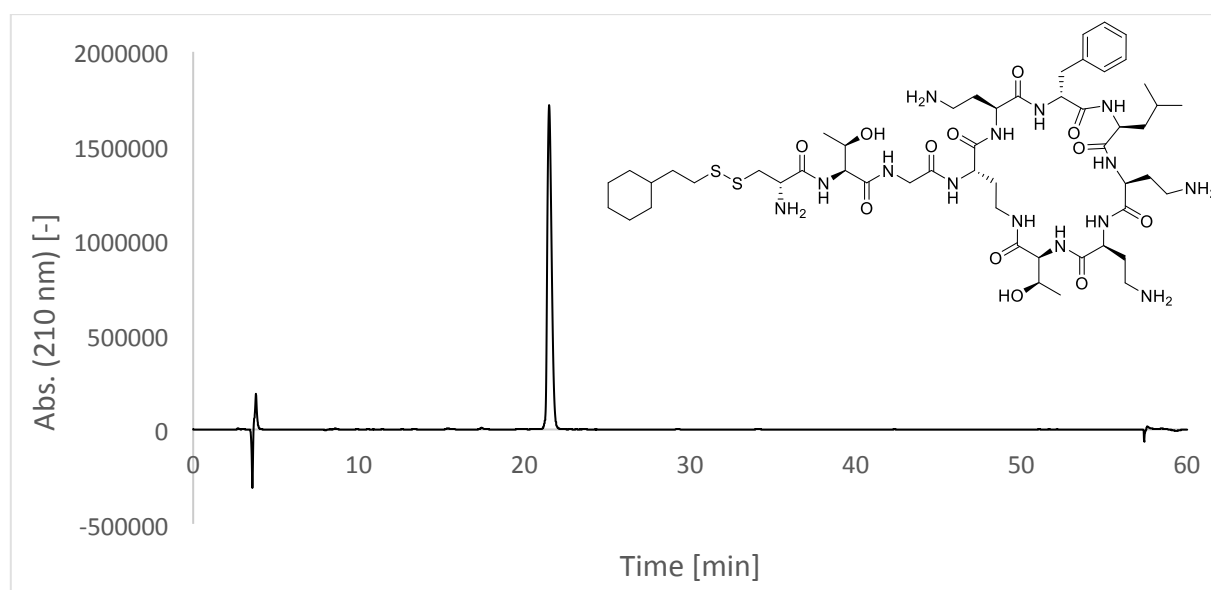

### Compound 7c

| Composition                                                                    | Exact mass | M + H     | (M+2H)/2 | Found value |
|--------------------------------------------------------------------------------|------------|-----------|----------|-------------|
| C <sub>53</sub> H <sub>91</sub> N <sub>15</sub> O <sub>12</sub> S <sub>2</sub> | 1193.6413  | 1194.6493 | 597.8287 | 1194.6489   |

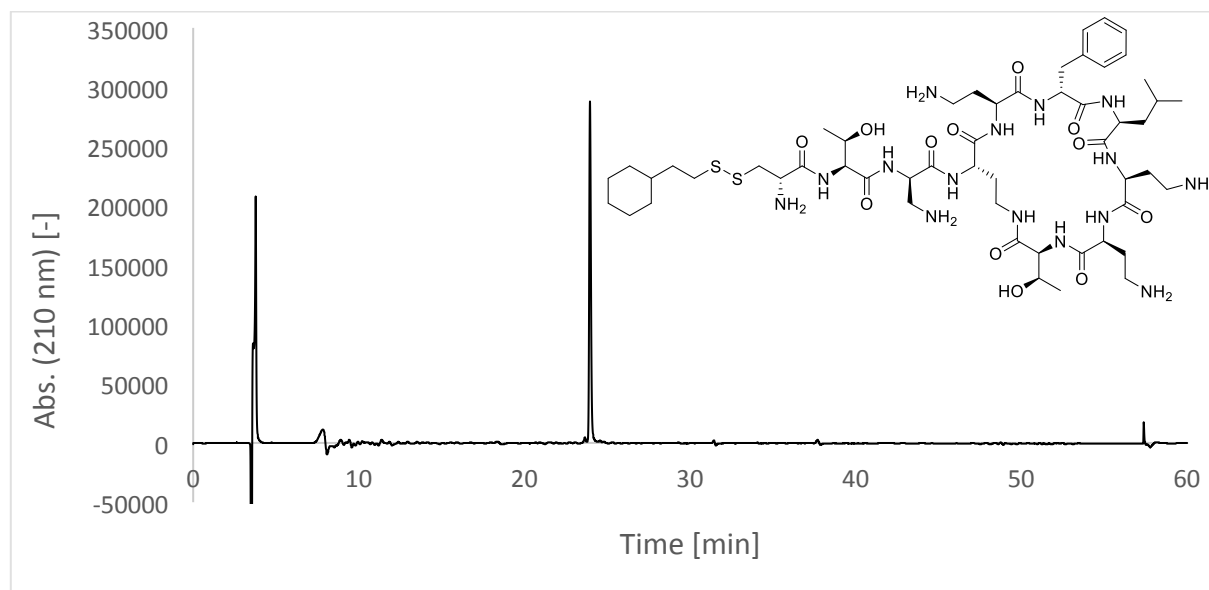

### Compound 7d

| Composition                                                                    | Exact mass | M + H     | (M+2H)/2 | Found value |
|--------------------------------------------------------------------------------|------------|-----------|----------|-------------|
| C <sub>53</sub> H <sub>91</sub> N <sub>15</sub> O <sub>12</sub> S <sub>2</sub> | 1193.6413  | 1194.6493 | 597.8287 | 1194.6492   |

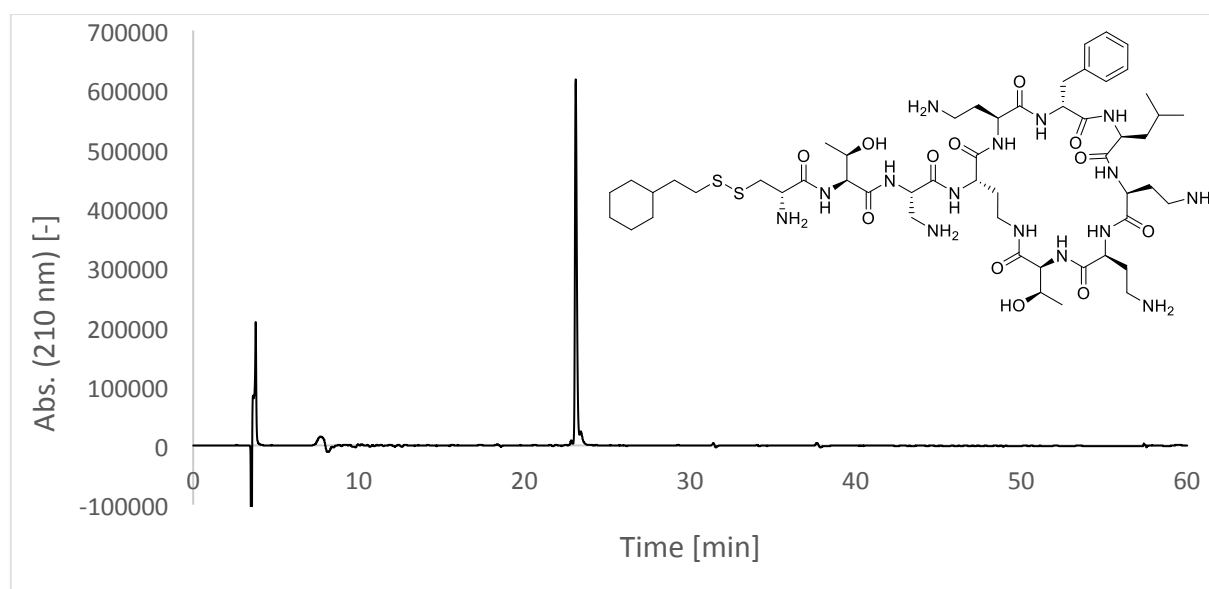

### Compound 7e

| Composition                                                                    | Exact mass | M + H     | (M+2H)/2 | Found value |
|--------------------------------------------------------------------------------|------------|-----------|----------|-------------|
| C <sub>54</sub> H <sub>93</sub> N <sub>15</sub> O <sub>12</sub> S <sub>2</sub> | 1207.6570  | 1208.6650 | 604.8365 | 604.8357    |

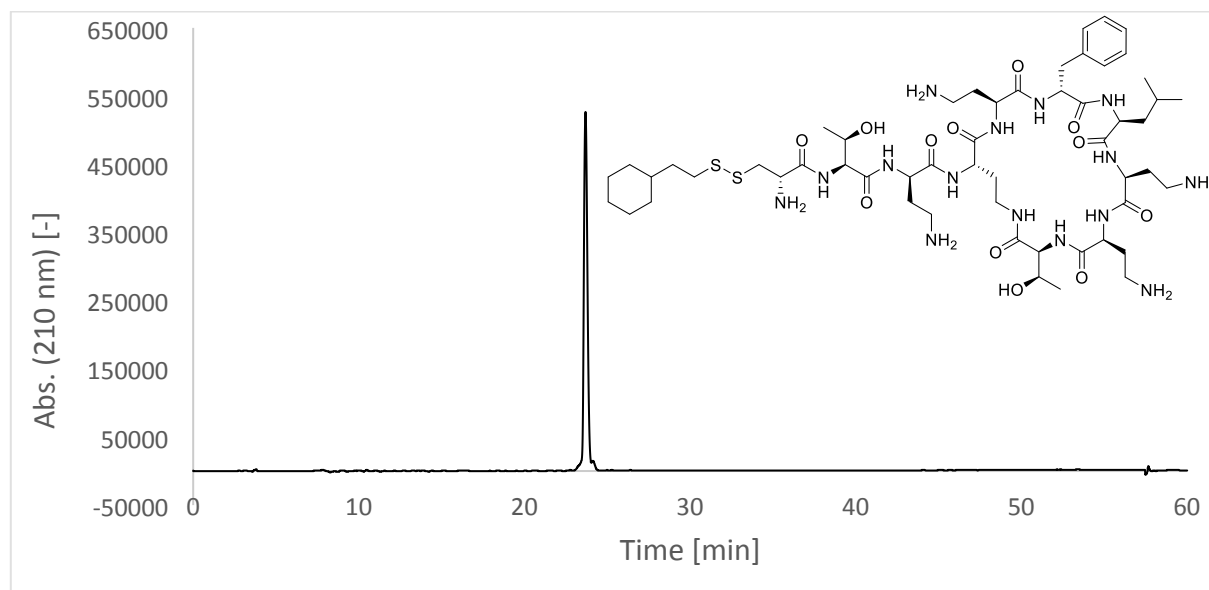

### Compound 8a

| Composition                                                                    | Exact mass | M + H     | (M+2H)/2 | Found value |
|--------------------------------------------------------------------------------|------------|-----------|----------|-------------|
| C <sub>50</sub> H <sub>86</sub> N <sub>14</sub> O <sub>13</sub> S <sub>2</sub> | 1154.5940  | 1155.6020 | 578.3050 | 578.3046    |

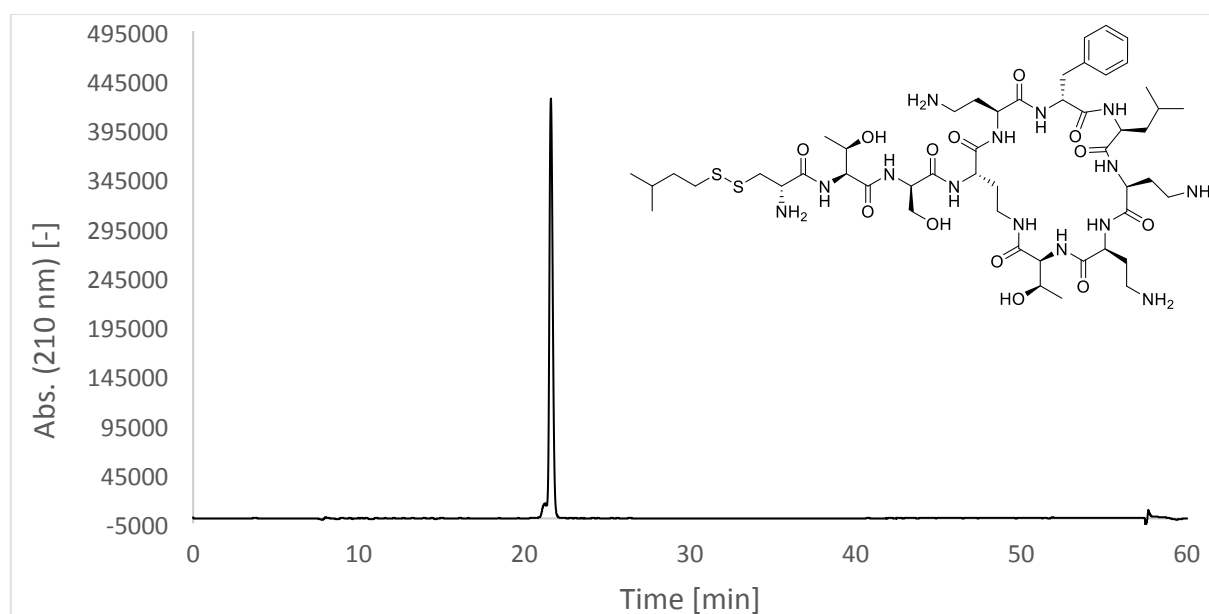

### Compound 8b

| Composition                                                                    | Exact mass | M + H     | (M+2H)/2 | Found value |
|--------------------------------------------------------------------------------|------------|-----------|----------|-------------|
| C <sub>49</sub> H <sub>84</sub> N <sub>14</sub> O <sub>12</sub> S <sub>2</sub> | 1124.5835  | 1125.5915 | 563.2998 | 563.2990    |

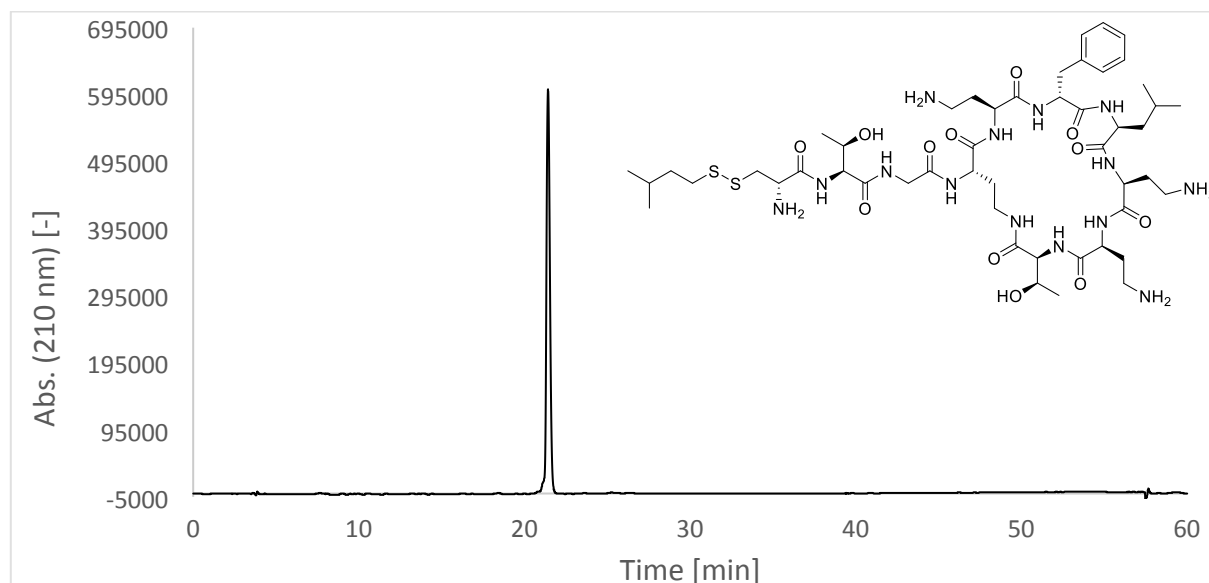

### Compound 8c

| Composition                                                                    | Exact mass | M + H     | (M+2H)/2 | Found value |
|--------------------------------------------------------------------------------|------------|-----------|----------|-------------|
| C <sub>50</sub> H <sub>87</sub> N <sub>15</sub> O <sub>12</sub> S <sub>2</sub> | 1153.6100  | 1154.6180 | 577.8130 | 577.8128    |

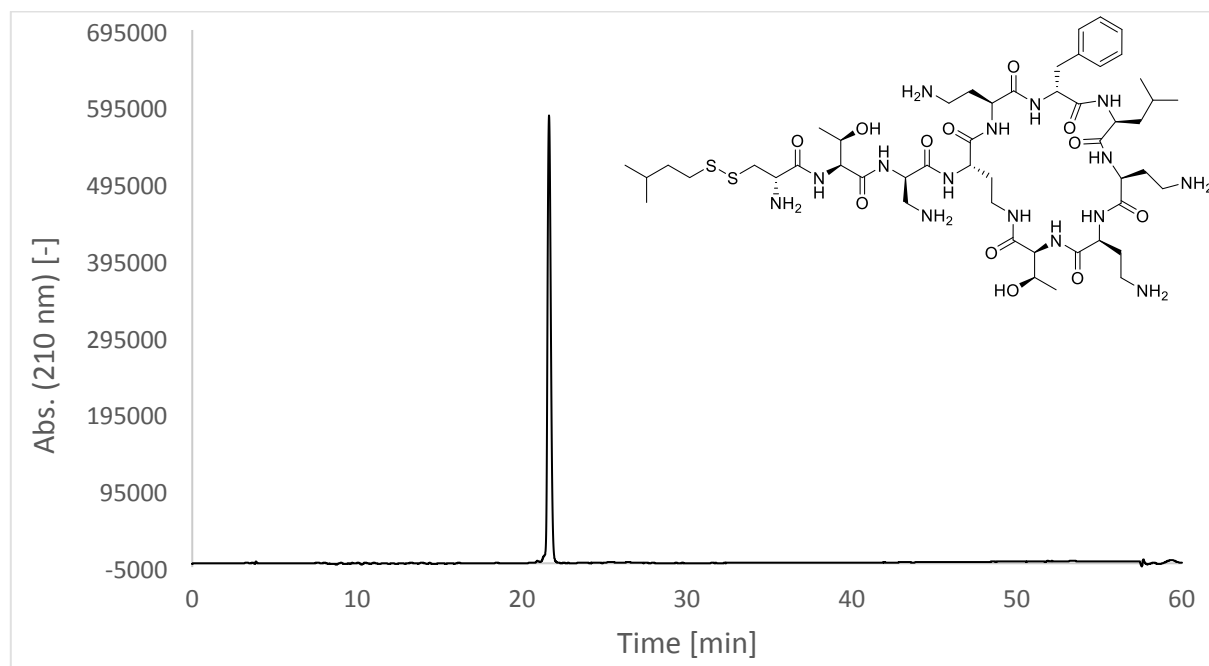

### Compound 8d

| Composition                                                                    | Exact mass | M + H     | (M+2H)/2 | Found value |
|--------------------------------------------------------------------------------|------------|-----------|----------|-------------|
| C <sub>50</sub> H <sub>87</sub> N <sub>15</sub> O <sub>12</sub> S <sub>2</sub> | 1153.6100  | 1154.6180 | 577.8130 | 577.8122    |

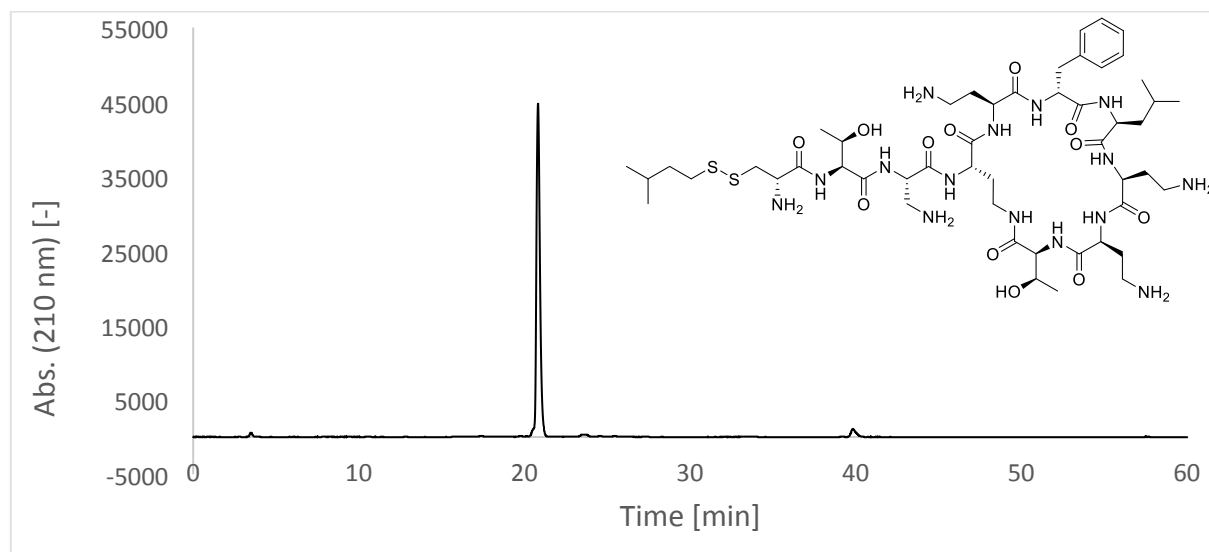

### Compound 8e

| Composition                                                                    | Exact mass | M + H     | (M+2H)/2 | Found value |
|--------------------------------------------------------------------------------|------------|-----------|----------|-------------|
| C <sub>51</sub> H <sub>89</sub> N <sub>15</sub> O <sub>12</sub> S <sub>2</sub> | 1167.6257  | 1168.6337 | 584.8209 | 584.8198    |

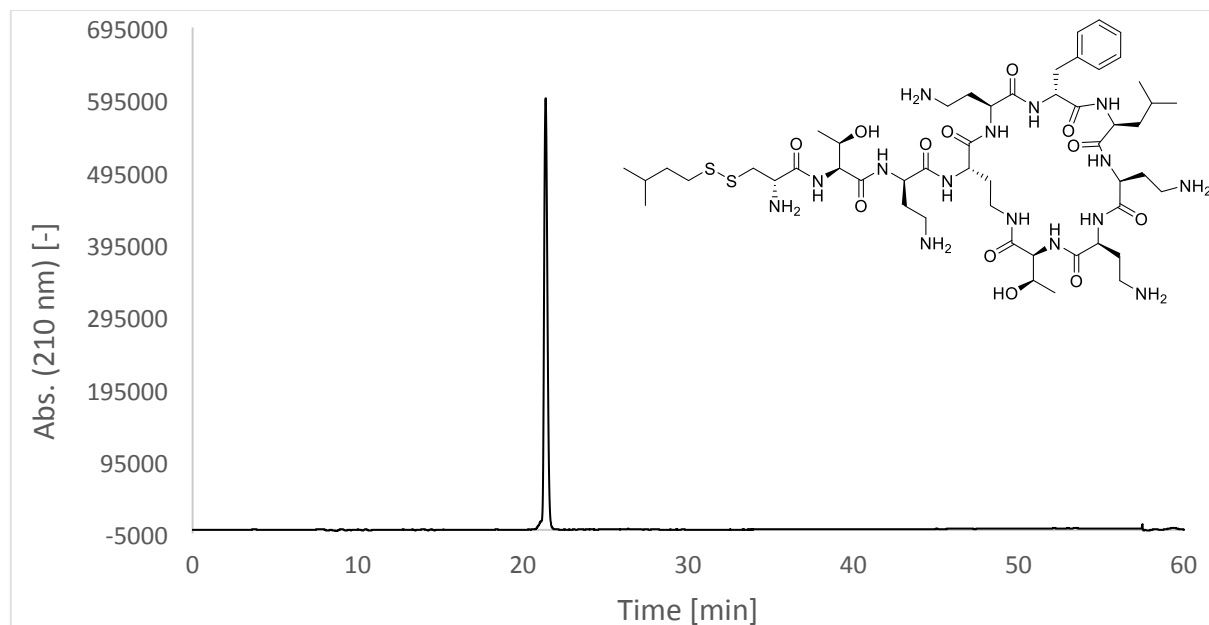

### Compound 9a

| Composition                                                                      | Exact mass | M + H     | (M+2H)/2 | Found value |
|----------------------------------------------------------------------------------|------------|-----------|----------|-------------|
| C <sub>52</sub> H <sub>81</sub> ClN <sub>14</sub> O <sub>13</sub> S <sub>2</sub> | 1208.5237  | 1209.5317 | 605.2699 | 1209.5311   |

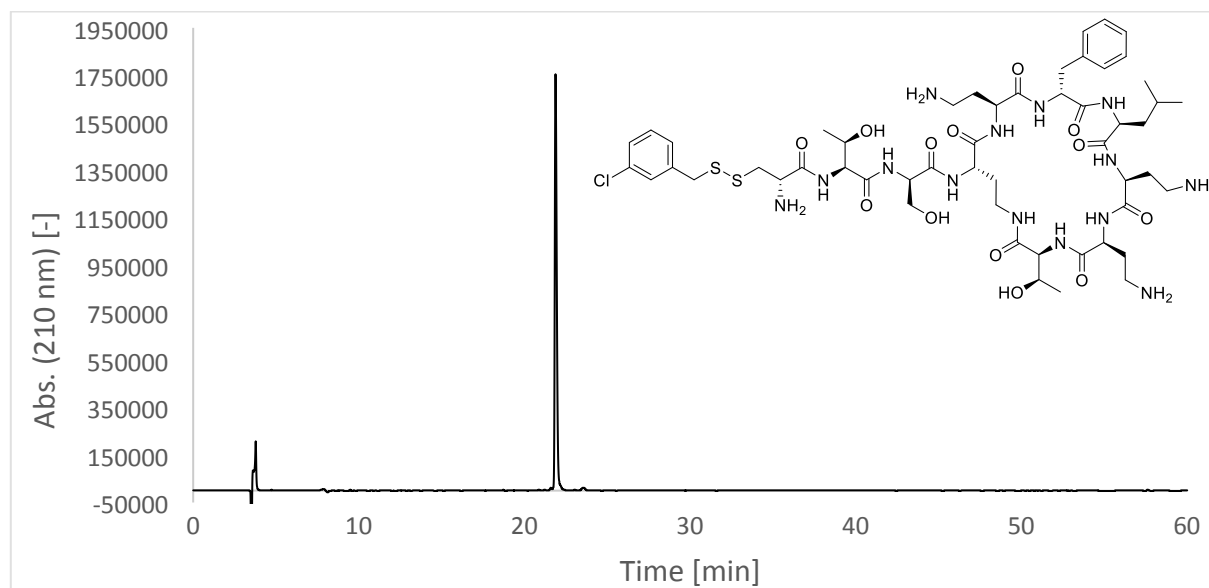

### Compound 9b

| Composition                                                                      | Exact mass | M + H     | (M+2H)/2 | Found value |
|----------------------------------------------------------------------------------|------------|-----------|----------|-------------|
| C <sub>51</sub> H <sub>79</sub> ClN <sub>14</sub> O <sub>12</sub> S <sub>2</sub> | 1178.5132  | 1179.5212 | 590.2646 | 1179.5210   |

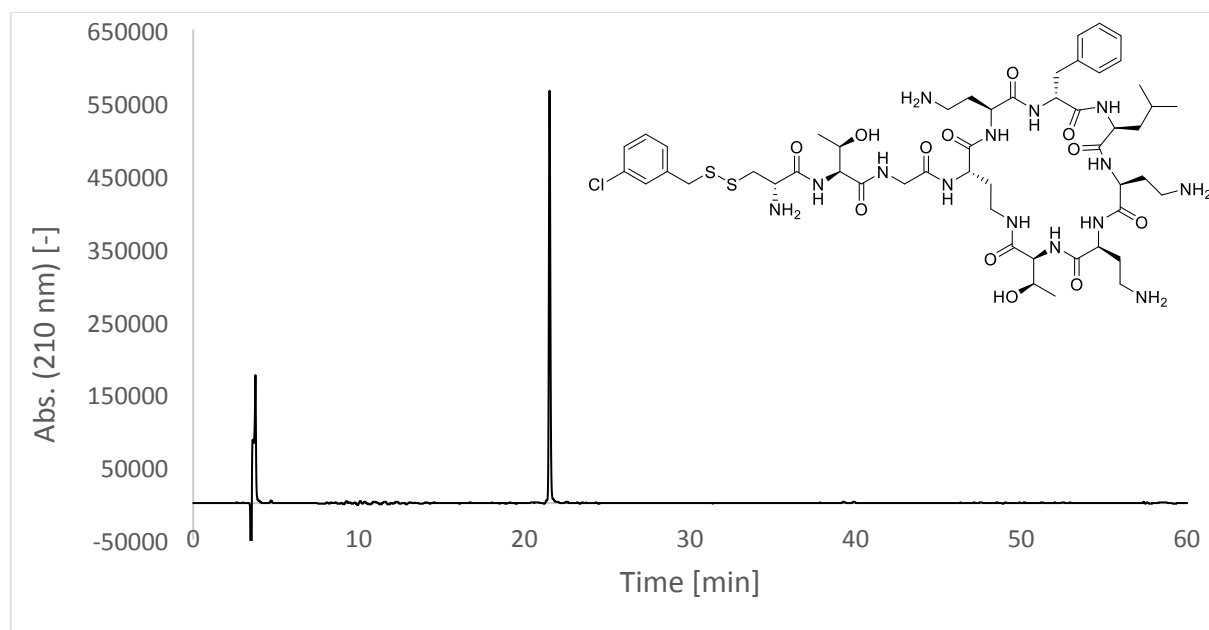



### Compound 9c

| Composition                                                                      | Exact mass | M + H     | (M+2H)/2 | Found value |
|----------------------------------------------------------------------------------|------------|-----------|----------|-------------|
| C <sub>52</sub> H <sub>82</sub> ClN <sub>15</sub> O <sub>12</sub> S <sub>2</sub> | 1207.5397  | 1208.5477 | 604.7779 | 1208.5476   |

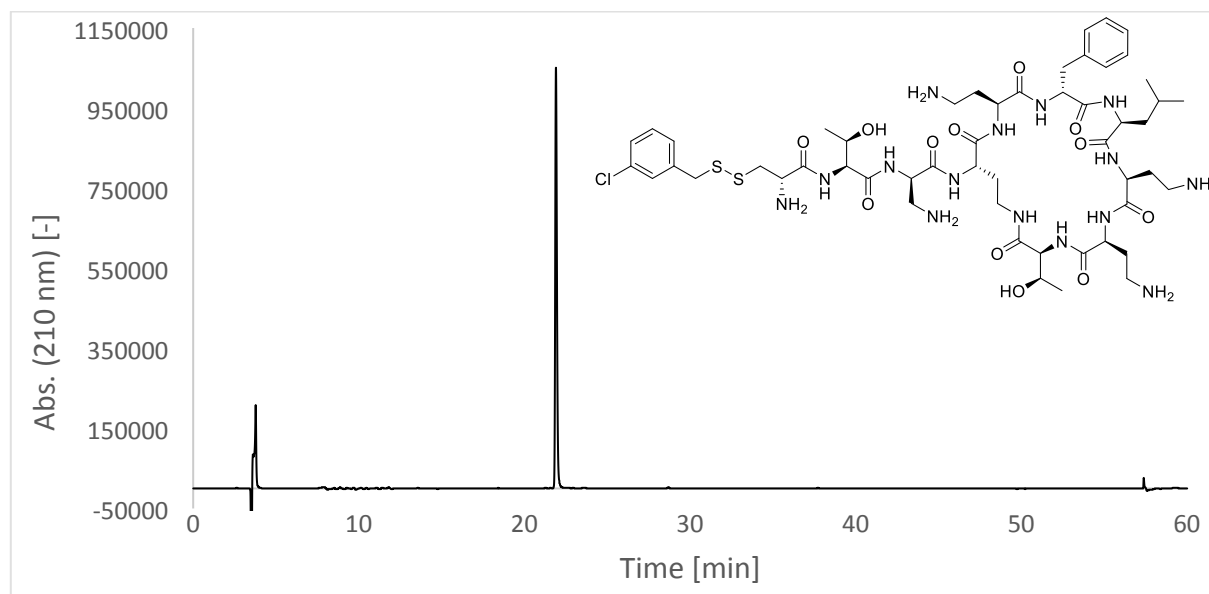

### Compound 9d

| Composition                                                                      | Exact mass | M + H     | (M+2H)/2 | Found value |
|----------------------------------------------------------------------------------|------------|-----------|----------|-------------|
| C <sub>52</sub> H <sub>82</sub> ClN <sub>15</sub> O <sub>12</sub> S <sub>2</sub> | 1207.5397  | 1208.5477 | 604.7779 | 1208.5477   |

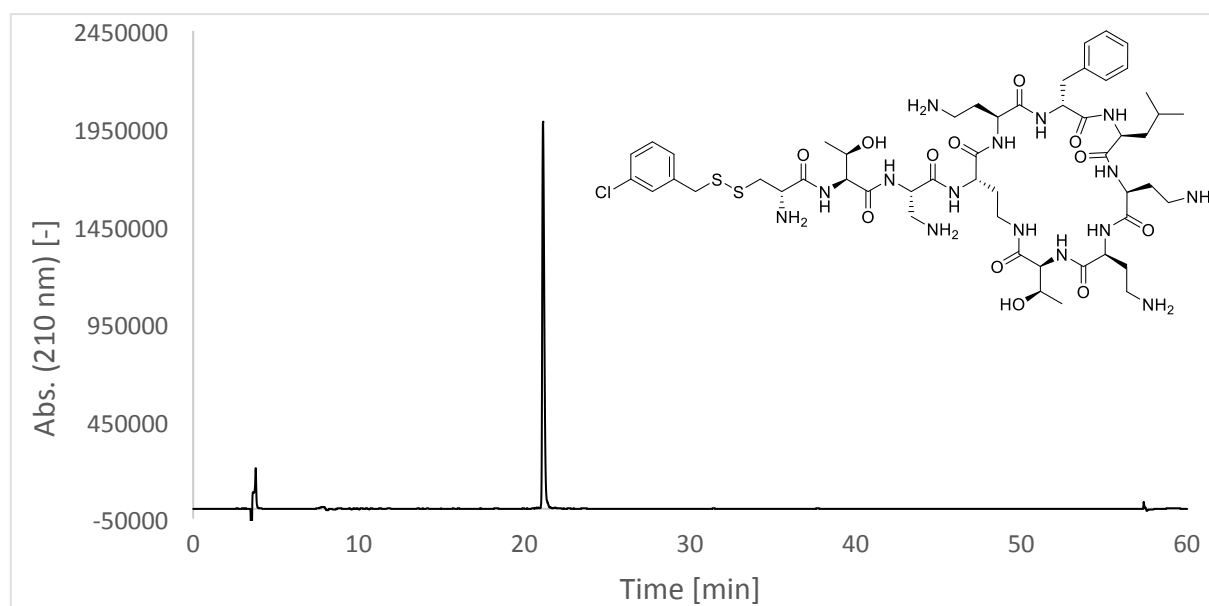

### Compound 9e

| Composition                                                                      | Exact mass | M + H     | (M+2H)/2 | Found value |
|----------------------------------------------------------------------------------|------------|-----------|----------|-------------|
| C <sub>53</sub> H <sub>84</sub> ClN <sub>15</sub> O <sub>12</sub> S <sub>2</sub> | 1221.5554  | 1222.5634 | 611.7857 | 1222.5620   |

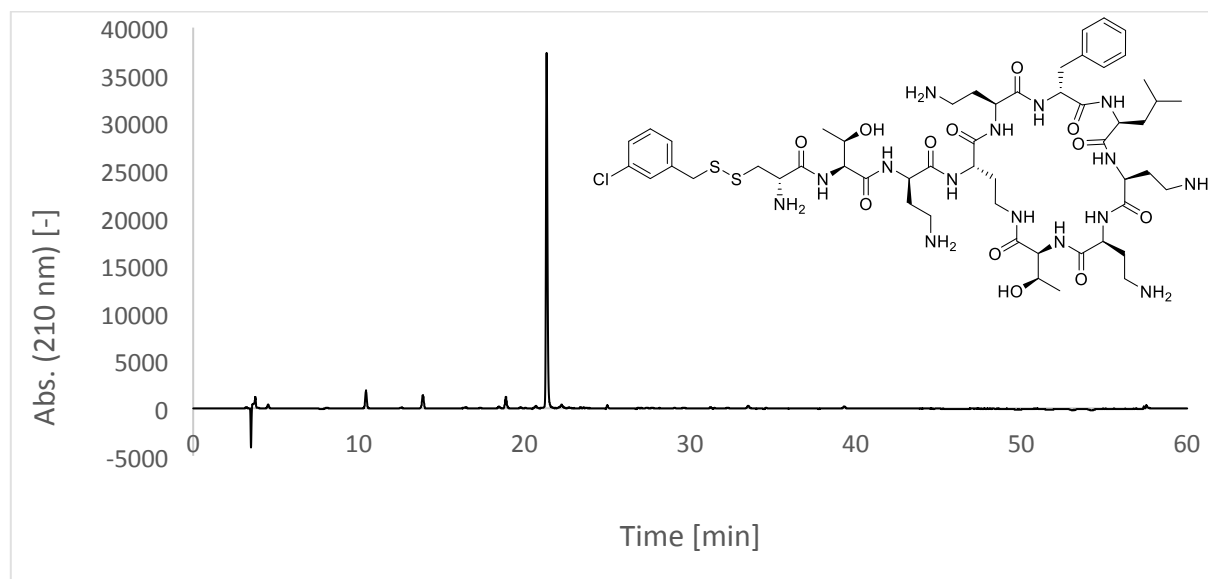

Analytical data for compounds **7f**, **8f** and **9f** have been previously reported.<sup>1</sup>

## Extended toxicity data on all analogues

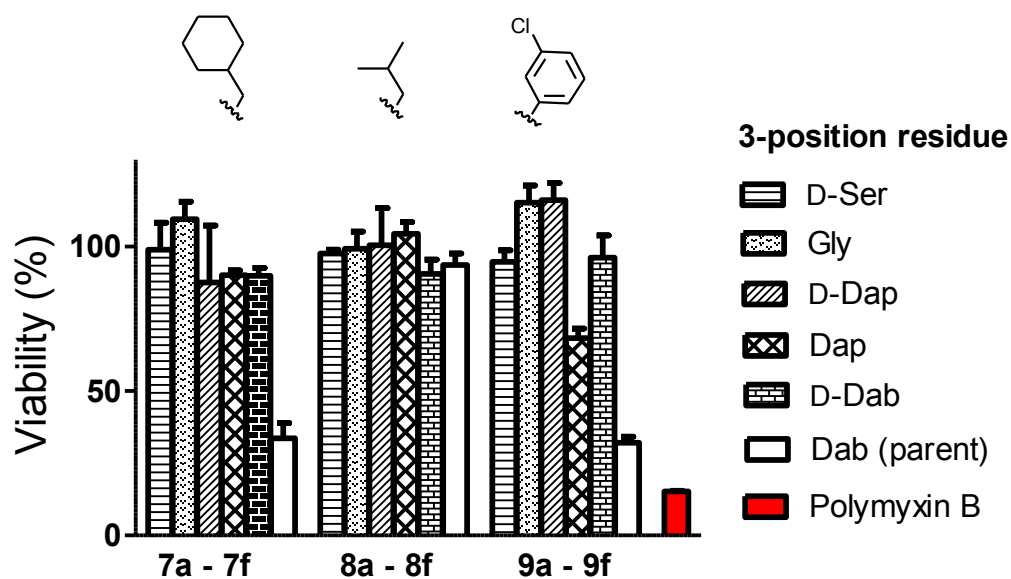

**Figure S1.** Viability of PTECs upon incubation with polymyxin analogues. Cells were exposed to the compound at 100  $\mu\text{M}$  for 24 hours, followed by washing, incubation with resazurin (PrestoBlue<sup>TM</sup>) and fluorescence read-out. Data are normalized to positive control (medium treated cells). Represented data are from triplicates.

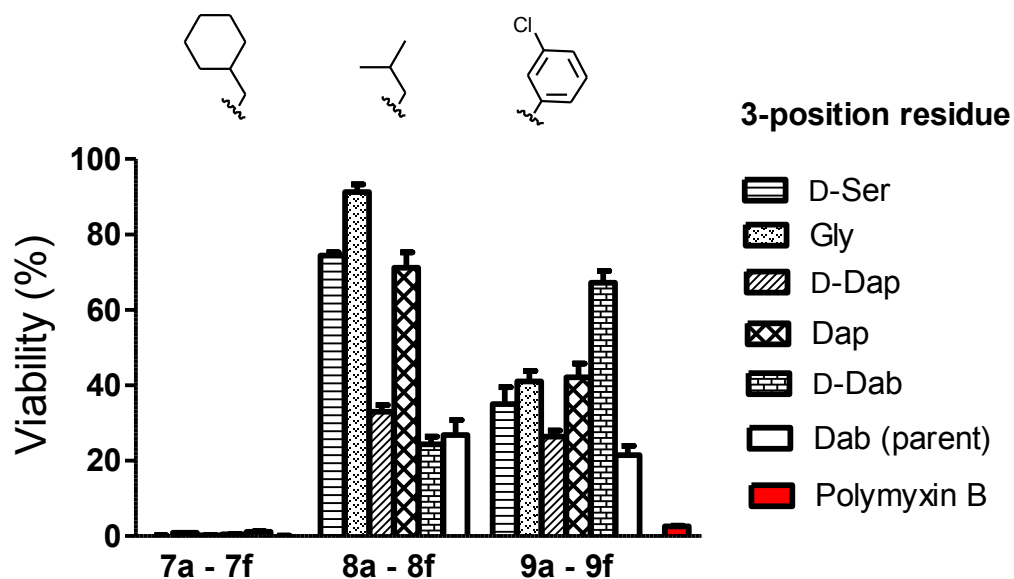

**Figure S2.** Viability of PTECs upon incubation with polymyxin analogues. Cells were exposed to the compound at 500  $\mu\text{M}$  for 24 hours, followed by washing, incubation with resazurin (PrestoBlue<sup>TM</sup>) and fluorescence read-out. Data are normalized to positive control (medium treated cells). Represented data are from triplicates.

### Extended toxicity data on 8d

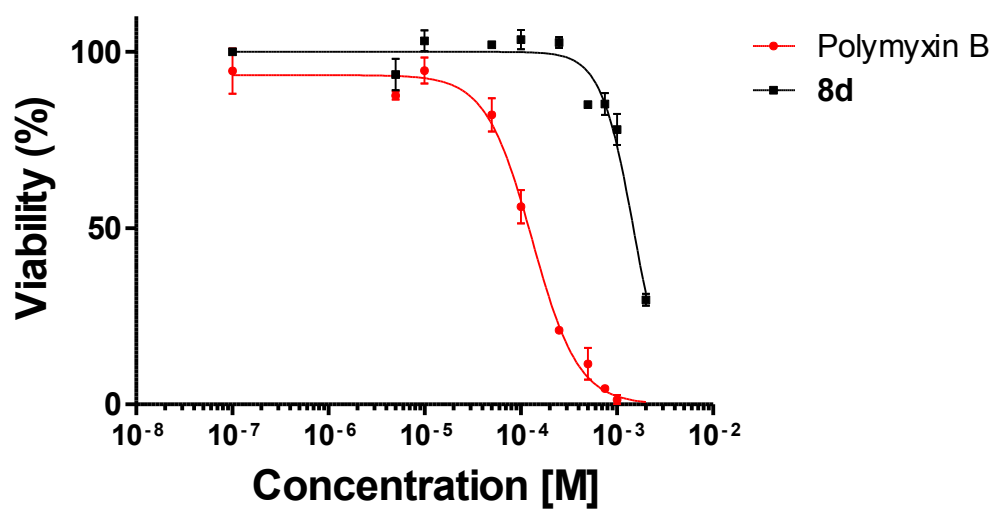

**Figure S3.** Viability of PTECs upon incubation with polymyxin B and analogue 8d. Cells were exposed to the compound for 24 hours, followed by washing, incubation with resazurin (PrestoBlue™) and fluorescence read-out. Data are normalized to positive control (medium treated cells). Represented data are from triplicates.

## Extended MIC data

**Table S1.** Extended MIC data on compound **8d**.

|                      | Strain            | Resistance                               | MIC values (µg/mL) |             |
|----------------------|-------------------|------------------------------------------|--------------------|-------------|
|                      |                   |                                          | 8d                 | Polymyxin B |
| <i>E. coli</i>       | NCTC 13846        | <i>mcr-1</i> , others (not specified)    | 4                  | 4           |
|                      | 2158              | OXA                                      | 4                  | 2           |
|                      | RC089             | NDM-1                                    | 0.25               | 0.125       |
|                      | 2018-014          | IMP-4                                    | 0.5                | 0.25        |
|                      | 1062              | NDM-5                                    | 0.5                | 0.25        |
|                      | M0072             | Ciprofloxacin, doxycycline, trimethoprim | 0.5                | 0.25        |
|                      | JS136             | OXA-48                                   | 0.5                | 0.25        |
|                      | NCTC 12486        | -                                        | 0.5                | 0.25        |
|                      | <i>mcr-1</i>      | <i>mcr-1</i>                             | 4                  | 4           |
|                      | EQAS <i>mcr-1</i> | <i>mcr-1</i>                             | 4                  | 2           |
| EQAS <i>mcr-2</i>    | <i>mcr-2</i>      | 4                                        | 4                  |             |
| <i>K. pneumoniae</i> | 2048              | OXA-1, SHV-11, CTX-M-15, TEM-1C          | 2                  | 0.5         |
|                      | JS-022            | NDM-1                                    | 2                  | 2           |
|                      | 1124              | VIM-1                                    | 2                  | 1           |
| <i>P. aeruginosa</i> | RC0060            | VIM-2, blaPAO                            | 4                  | 4           |
|                      | ATCC 10145        | -                                        | 2                  | 2           |
|                      | 2251              | VIM-2                                    | 2                  | 4           |
|                      | 2018-011          | NDM-1                                    | 2                  | 1           |
|                      | JS-080            | IMP-13, IMP-37, blaPAO                   | 2                  | 1           |
|                      | 2173              | VIM-2, blaPAO, OXA-50                    | 2                  | 2           |
| <i>A. baumannii</i>  | RUH-134           | Multiple <sup>2</sup>                    | 0.5                | 0.25        |
|                      | 9955              | -                                        | 0.5                | 0.25        |
|                      | NRZ-00687         | NDM-2                                    | 1                  | 0.25        |
|                      | ATCC 17961        | -                                        | 0.25               | 0.125       |
|                      | BAA-747           | -                                        | 0.5                | 0.25        |

## Synergy data on polymyxin B and 8d with Gram-positive selective antibiotics

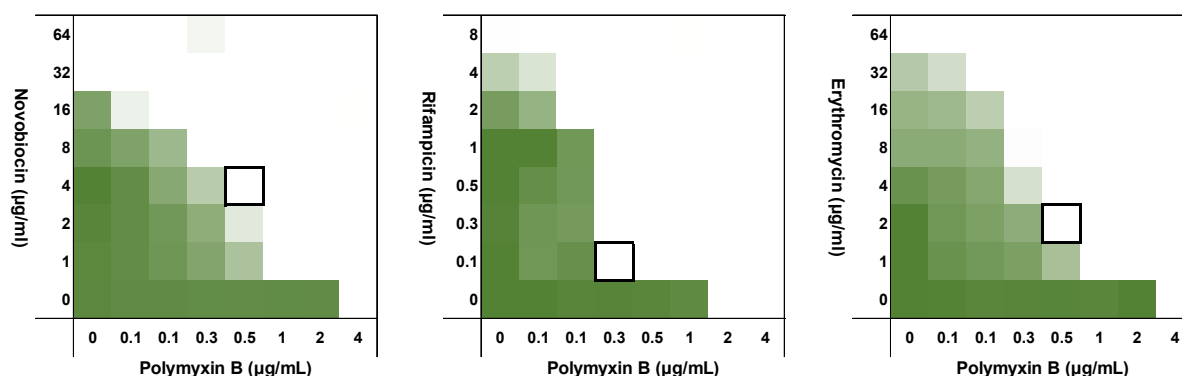

**Figure S4.** Checkerboard assays results, exploring synergetic activity between polymyxin B and antibiotics typically used for Gram-positive bacteria only: novobiocin (left), rifampicin (middle) and erythromycin (right). Experiments are done on *mcr-2* positive *E. coli*. Color intensity corresponds to growth (as read by OD<sub>600</sub> measurements), with white areas indicating no growth. Each square represent data from a technical triplicate. The bounded box indicates the combination of antibiotic and synergist with the lowest FIC.

**Table S2.** MIC and MSC values for synergist-antibiotic concentrations as shown in Figure 4, Table 2 and Figure S4. MIC<sub>ant</sub>: MIC of the antibiotic. MIC<sub>syn</sub>: MIC of the synergist. MSC<sub>ant</sub>: synergistic concentration of the antibiotic corresponding to the indicated FIC value. MSC<sub>syn</sub>: synergistic concentration of the synergist corresponding to the indicated FIC value. FIC index: fractional inhibitory concentration index. MIC and MSC values are expressed in µg/mL.

| Synergist   | Antibiotic   | MIC <sub>ant</sub> | MIC <sub>syn</sub> | MSC <sub>ant</sub> | MSC <sub>syn</sub> | FIC index |
|-------------|--------------|--------------------|--------------------|--------------------|--------------------|-----------|
| 8d          | Novobiocin   | 32                 | 4                  | 2                  | 0.5                | 0.19      |
| 8d          | Rifampicin   | 8                  | 4                  | 0.13               | 0.5                | 0.14      |
| 8d          | Erythromycin | 64                 | 4                  | 1                  | 1                  | 0.27      |
| Polymyxin B | Novobiocin   | 32                 | 4                  | 4                  | 0.5                | 0.25      |
| Polymyxin B | Rifampicin   | 8                  | 4                  | 0.13               | 0.25               | 0.08      |
| Polymyxin B | Erythromycin | 64                 | 4                  | 2                  | 0.5                | 0.16      |

### Bacterial strains used for MIC assays

The following strains were obtained from BEI Resources, NIAID, NIH:  
*E. Coli* M0072, strain MVA0072, NR-51488.

**Table S3.** Background of the strains used for MIC testing, as shown in Table 1.  
NDM: New Dehli Metallobetalactamase; OXA: oxacillinase; IMP: imipenemase.

| Strain               | Resistance |                                       |
|----------------------|------------|---------------------------------------|
| <i>E. coli</i>       | ATCC 25922 | -                                     |
|                      | 1313       | NDM-1                                 |
|                      | NCTC 13846 | <i>mcr-1</i> , others (not specified) |
| <i>K. pneumoniae</i> | ATCC 13883 | -                                     |
|                      | JS-123     | NDM                                   |
|                      | NCTC 13443 | NDM-1                                 |
| <i>A. baumannii</i>  | ATCC 19606 | -                                     |
|                      | ATCC 17978 | -                                     |
|                      | MDR        | Multi drug resistant (not specified)  |
|                      | 2018-006   | NDM/OXA-023/OXA-051                   |
| <i>P. aeruginosa</i> | ATCC 27853 | -                                     |
|                      | NRZ 08418  | NDM-1                                 |
|                      | NRZ 03961  | IMP-1                                 |

### References

- 1 C. J. Slingerland, C. M. J. Wesseling, P. Innocenti, K. G. C. Westphal, R. Masereeuw and N. I. Martin, *J. Med. Chem.*, 2022, **65**, 15878–15892.
- 2 S. J. Nigro and R. M. Hall, *J. Antimicrob. Chemother.*, 2012, **67**, 335–338.
